# Supplementary material for: Transfection of Vein Grafts with Early Growth Response Factor-1 Oligodeoxynucleotide Decoy: Effects on Stem-Cell Genes and Toll-like Receptor-Mediated Inflammation
Source: MDPI journal article supplement (doi:10.3390/ijms242115866), 2023-11-01
Supplement: s1 [file s1]

**Table S1.** Genes of interest: mRNA expression

| <b>Target genes</b>            |      | <b>Mutant (group B)</b> | <b>Untreated (group D)</b> | <b>Decoy (group E)</b> |
|--------------------------------|------|-------------------------|----------------------------|------------------------|
| <b>TLR2</b>                    | mean | 7.672                   | 13.28                      | 5.103                  |
|                                | SD   | 1.267                   | 1.062                      | 0.909                  |
| <b>TLR3</b>                    | mean | 9.933                   | 12.21                      | 2.527                  |
|                                | SD   | 1.576                   | 0.533                      | 1.105                  |
| <b>TLR4</b>                    | mean | 7.208                   | 8.993                      | 3.877                  |
|                                | SD   | 0.874                   | 0.814                      | 0.838                  |
| <b>TLR8</b>                    | mean | 12.93                   | 15.01                      | 10.70                  |
|                                | SD   | 2.936                   | 2.552                      | 2.419                  |
| <b>MYD88</b>                   | mean | 2.675                   | 3.820                      | 1.787                  |
|                                | SD   | 0.762                   | 1.203                      | 0.576                  |
| <b>NFkB</b>                    | mean | 4.273                   | 11.04                      | 1.198                  |
|                                | SD   | 0.783                   | 1.249                      | 0.218                  |
| <b>CCL4</b>                    | mean | 2.958                   | 5.142                      | 2.198                  |
|                                | SD   | 0.581                   | 1.115                      | 0.323                  |
| <b>CCL20</b>                   | mean | 7.818                   | 11.00                      | 5.677                  |
|                                | SD   | 1.052                   | 1.113                      | 0.639                  |
| <b>CCR2</b>                    | mean | 2.88                    | 11.11                      | 1.680                  |
|                                | SD   | 0.583                   | 1.275                      | 0.335                  |
| <b>IFNb</b>                    | mean | 2.508                   | 4.000                      | 1.403                  |
|                                | SD   | 0.369                   | 0.327                      | 0.142                  |
| <b>IFN<math>\gamma</math></b>  | mean | 2.033                   | 10.98                      | 1.758                  |
|                                | SD   | 0.132                   | 1.085                      | 0.192                  |
| <b>TNFa</b>                    | mean | 3.145                   | 11.11                      | 2.918                  |
|                                | SD   | 0.53                    | 1.275                      | 0.508                  |
| <b>IL1b</b>                    | mean | 2.54                    | 6.270                      | 2.143                  |
|                                | SD   | 0.513                   | 0.701                      | 0.755                  |
| <b>IL2</b>                     | mean | 562                     | 7.520                      | 5.295                  |
|                                | SD   | 0.548                   | 1.148                      | 1.163                  |
| <b>IL4</b>                     | mean | 8.218                   | 9.417                      | 7.542                  |
|                                | SD   | 0.797                   | 0.753                      | 0.806                  |
| <b>IL8</b>                     | mean | 1.847                   | 2.515                      | 1.165                  |
|                                | SD   | 0.679                   | 0.783                      | 0.122                  |
| <b>IL10</b>                    | mean | 3.803                   | 7.365                      | 2.455                  |
|                                | SD   | 0.81                    | 0.957                      | 0.919                  |
| <b>IL18</b>                    | mean | 2.713                   | 4.212                      | 1.325                  |
|                                | SD   | 0.298                   | 0.68                       | 0.235                  |
| <b>KLF4</b>                    | mean | 3.135                   | 5.312                      | 1.722                  |
|                                | SD   | 0.429                   | 0.726                      | 0.224                  |
| <b>HOXA5</b>                   | mean | 4.007                   | 7.018                      | 2.998                  |
|                                | SD   | 0.329                   | 0.941                      | 0.296                  |
| <b>NANOG</b>                   | mean | 3.588                   | 5.285                      | 2.403                  |
|                                | SD   | 0.809                   | 0.732                      | 0.862                  |
| <b>H1F1<math>\alpha</math></b> | mean | 2.510                   | 4.105                      | 1.125                  |
|                                | SD   | 0.394                   | 0.657                      | 0.171                  |

*Myeloid differentiation primary response 88 (MYD88); Nuclear factor kappa-light-chain-enhancer of activated B cells (NF- $\kappa$ B); C-C chemokine ligand (CCL4); Chemokine (C-C motif) ligand 20 (CCL20); C-C chemokine receptor type 2 (CCR2); Interferon beta (IFN- $\beta$ ); Interferon gamma (IFN- $\gamma$ ); tumor necrosis factor alpha (TNF- $\alpha$ ); interleukin 1b (IL-1b); interleukin 2 (IL-2); interleukin 4 (IL-4); interleukin 8 (IL-8); interleukin 10 (IL-10); interleukin 18 (IL-18); krüppel-like factor 4 (KLF4); hypoxia-inducible factor 1-alpha (HIF1 $\alpha$ )*
