# Supplementary material for: Transfection of Vein Grafts with Early Growth Response Factor-1 Oligodeoxynucleotide Decoy: Effects on Stem-Cell Genes and Toll-like Receptor-Mediated Inflammation
Source: MDPI journal article supplement (doi:10.3390/ijms242115866), 2023-11-01
Supplement: s1 [file s1]

**Supplemental Table S2. Primers**

| Rabbit target gene | Forward primer           | Reverse primer               | Target size | NM             |
|--------------------|--------------------------|------------------------------|-------------|----------------|
| <b>b actin</b>     | CCATGTACGTGGCCATCCAG     | TCTTCATGAGGTAGTCGGTCAGGTC    | 148nts      | NM_001101683   |
| <b>TLR2</b>        | CTCCTGCTGACGCTGCTC       | TTCCTCGGCTTCCTCTTGG          | 120nts      | Trace Archive  |
| <b>TLR3</b>        | ATCTCCTCTCTTTGGGGACTGTTG | TGTTGGTGGGCAGGTCATCAGG       | 125nts      | Trace Archive  |
| <b>TLR4</b>        | CTCACATCCGAGTTGCCTTCCG   | AAATGCTCCCTGGTACACCTGTTC-3   | 125nts      | Trace Archive  |
| <b>TLR8</b>        | ATCTTGTCTCTTCTCTCGTTCTC  | CCTGTAACCTCTGACCTTGG         | 126nts      | Trace Archive  |
| <b>MYD88</b>       | CCCTTTGTCTCTCGACTCTTGG   | TACGAGAACAGCCACTGCCC         | 125nts      | Trace Archive  |
| <b>NFκB</b>        | ATGCCAATGCCCTCTTCGACT    | CGTGACTTCCAGCAGATCCCT        | 122nts      | Trace Archive  |
| <b>CCL4</b>        | GAGACCACCAGCCTCTGCTC     | TCAGTTCAGTTCCAAGTCATCCAC     | 123nts      | NM_001082196   |
| <b>CCL20</b>       | TATCGTGGGCTTCACACAGC     | CCATTCTTCTTCGGATCTGC         | 115nts      | Trace Archive  |
| <b>CCR2</b>        | GGTTGCTGAGAAGCCTGACACGC  | CAGGTCTGTATTCTTCAACAAGCCCTCG | 125nts      | Trace Archive  |
| <b>IFNβ</b>        | TCCAACATATGGCACGGAAGTCT  | TTCTGGAGCTGTTGTGGTTCCT       | 133nts      | XM_002707968   |
| <b>IFNγ</b>        | TGCCAGGACACACTAACCAGAG   | TGTCACCTCTCTCTTCCAATTCC      | 127nts      | NM_001081991   |
| <b>TNFα</b>        | CTGCACTTCAGGGTGATCG      | CTACGTGGGCTAGAGGCTTG         | 133nts      | NM_001082263   |
| <b>IL1b</b>        | TTGAAGAAGAACCCGCTCTCTG   | CTCATACGTGCCAGACAACACC       | 128nts      | NM_001082201   |
| <b>IL2</b>         | GCCCAAGAAGGTCACAGAATTG   | TGCTGATTGATTCTCTGGTATTTCC    | 128nts      | NM_001163180   |
| <b>IL4</b>         | CGACATCATCCTACCCGAAGTC   | CCTCTCTCTCGGTTGTGTTCTTG      | 122nts      | NM_001163177   |
| <b>IL8</b>         | CCACACCTTCCATCCCAAAT     | CTTCTGCACCCACTTTTCCTTG       | 122nts      | NM_001082293   |
| <b>IL10</b>        | CTTTGGCAGGGTGAAGACTTTC   | ACTGGATCATCTCCGACAAGG        | 126nts      | NM_001082045   |
| <b>IL18</b>        | ACCAAGGACAGCAACCTGTGTT   | ACAGAGAGGCTTACAGCCATGC       | 120nts      | NM_001122940   |
| <b>KLF4</b>        | ACGTACTCGCCTTGCTGATG     | CAAAAACCCCGAATTGCCCG         | 151         | XM_017347259.1 |
| <b>HOXA5</b>       | CATGCTCTTGCCTCTCCGA      | TTAGGGCAACGAGAACAGGG         | 248         | Trace Archive  |
| <b>NANOG</b>       | TACCCAGGCTTCTACCCTGC     | GGTTACTCCACGACTGGCTG         | 136         | XM_002712762.1 |
| <b>HIF1α</b>       | TTTTGGCAGCAACGACACAG     | GTGCAGGGTCAGCACTACTT         | 173         | Trace Archive  |

*Myeloid differentiation primary response 88 (MYD88); TLR: toll-like receptor; Nuclear factor kappa-light-chain-enhancer of activated B cells (NF-κB); C-C chemokine ligand (CCL4); Chemokine (C-C motif) ligand 20 (CCL20); C-C chemokine receptor type 2 (CCR2); Interferon beta (IFN-β); Interferon gamma (IFN-γ); tumor necrosis factor alpha (TNF-α); interleukin 1b (IL-1b); interleukin 2 (IL-2); interleukin 4 (IL-4); interleukin 8 (IL-8); interleukin 10 (IL-10); interleukin 18 (IL-18); krüppel-like factor 4 (KLF4); hypoxia-inducible factor 1-alpha (HIF1α)*
