# Supplementary material for: Transfection of Vein Grafts with Early Growth Response Factor-1 Oligodeoxynucleotide Decoy: Effects on Stem-Cell Genes and Toll-like Receptor-Mediated Inflammation
Source: MDPI journal article supplement (doi:10.3390/ijms242115866), 2023-11-01
Supplement: s1 [file s1]

|       | MYD88 | TLR2 | TLR3             | TLR4 | TLR8             | NFkB1 | CCL4 | CCL20            | IFNγ             | TNFα             | ILb | IL2              | IL4 | IL8              | IL10 | IL18 | KLF4 | HOXA5 | NANOG | H1F1a |
|-------|-------|------|------------------|------|------------------|-------|------|------------------|------------------|------------------|-----|------------------|-----|------------------|------|------|------|-------|-------|-------|
| MYD88 |       |      |                  |      |                  |       |      |                  |                  |                  |     |                  |     |                  |      |      |      |       |       |       |
| TLR2  |       |      |                  |      |                  |       |      |                  |                  |                  |     |                  |     |                  |      |      |      |       |       |       |
| TLR3  |       |      |                  |      |                  |       |      |                  |                  |                  |     |                  |     |                  |      |      |      |       |       |       |
| TLR4  |       |      |                  |      |                  |       |      |                  |                  |                  |     |                  |     |                  |      |      |      |       |       |       |
| TLR8  |       |      |                  |      |                  |       |      |                  |                  |                  |     |                  |     |                  |      |      |      |       |       |       |
| NFkB1 |       |      |                  |      |                  |       |      |                  |                  |                  |     |                  |     |                  |      |      |      |       |       |       |
| CCL4  |       |      | 0.016<br>(0.895) |      |                  |       |      |                  |                  |                  |     |                  |     |                  |      |      |      |       |       |       |
| CCL20 |       |      |                  |      |                  |       |      |                  |                  |                  |     |                  |     |                  |      |      |      |       |       |       |
| IFNγ  |       |      |                  |      |                  |       |      | 0.014<br>(0.902) |                  |                  |     |                  |     |                  |      |      |      |       |       |       |
| TNFα  |       |      |                  |      |                  |       |      |                  |                  |                  |     |                  |     |                  |      |      |      |       |       |       |
| ILb   |       |      |                  |      |                  |       |      |                  |                  |                  |     |                  |     |                  |      |      |      |       |       |       |
| IL2   |       |      |                  |      |                  |       |      |                  |                  |                  |     |                  |     |                  |      |      |      |       |       |       |
| IL4   |       |      |                  |      | 0.017<br>(0.891) |       |      |                  |                  | 0.048<br>(0.815) |     |                  |     |                  |      |      |      |       |       |       |
| IL8   |       |      |                  |      |                  |       |      |                  |                  |                  |     |                  |     |                  |      |      |      |       |       |       |
| IL10  |       |      |                  |      |                  |       |      |                  |                  |                  |     |                  |     |                  |      |      |      |       |       |       |
| IL18  |       |      |                  |      |                  |       |      |                  |                  |                  |     |                  |     |                  |      |      |      |       |       |       |
| KLF4  |       |      |                  |      |                  |       |      | 0.018<br>(0.860) | 0.028<br>(0.861) |                  |     |                  |     |                  |      |      |      |       |       |       |
| HOXA5 |       |      |                  |      |                  |       |      |                  |                  |                  |     |                  |     |                  |      |      |      |       |       |       |
| NANOG |       |      |                  |      |                  |       |      |                  |                  |                  |     |                  |     |                  |      |      |      |       |       |       |
| H1F1a |       |      |                  |      |                  |       |      |                  |                  |                  |     | 0.025<br>(0.868) |     | 0.037<br>(0.839) |      |      |      |       |       |       |
